# Supplementary material
Source: publisher site journal article supplement (https://www.dovepress.com/article/407891)
Supplement: Supplementary file 1 [file get_supplementary_file.php]

**Supplementary Data**

**Synthesis, anti-bacterial and molecular docking studies of arylated butyl 2-bromoisonicotinate against clinical isolates of *Escherichia coli* and methicillin-resistant *Staphylococcus aureus*.**

Shazia Naheed 1, Irum Umar Din 1, Muhammad Usman Qamar 2, Nasir Rasool 1*, Matloob Ahmad1, Muhammad Bilal1, Aqsa Khalid 3, Gulraiz Ahmad 1, Sami A Al-Hussain 4, Magdi E. A Zaki 4 ** ,

1 Department of Chemistry, Government College University Faisalabad, 38000, Pakistan

2 Institute of Microbiology, Faculty of Life Sciences, Government College, University, Faisalabad 38000, Pakistan

3 School of Interdisciplinary Engineering & Science (SINES), National University of Sciences and Technology (NUST), Islamabad 44000, Pakistan

4 Department of Chemistry, Faculty of Science, Imam Mohammad Ibn Saud Islamic University, Riyad, 11623, Saudi Arabia

*** Correspondence:** nasirrasool@gcuf.edu.pk, [mezaki@imamu.edu.sa](mailto:mezaki@imamu.edu.sa)

**Table of Contents**

[Figure S1: 1H NMR (500 MHz, DMSO-d6) spectrum of compound **3**. **S3**](#_Toc85435279)

[Figure S2: 1H NMR (500 MHz, DMSO-d6) spectrum of compound **5a**. **S3**](#_Toc85435282)

[Figure S3: 1H NMR (500 MHz, DMSO-d6) spectrum of compound **5c**. **S4**](#_Toc85435288)

[Figure S4: 1H NMR (500 MHz, DMSO-d6) spectrum of compound **5d**. **S4**](#_Toc85435289)

[Figure S5: 1H NMR (500 MHz, DMSO-d6) spectrum of compound **5e**. **S5**](#_Toc85435292)

[Figure S6: 1H NMR (500 MHz, DMSO-d6) spectrum of compound **5f**. **S5**](#_Toc85435293)

Figure S7: 1H NMR (500 MHz, DMSO-d6) spectrum of compound **5g**. **S6**

[Figure S8: 1H NMR (500 MHz, DMSO-d6) spectrum of compound **5h**. **S6**](#_Toc85435295)

Figure S9: Interaction pattern of 5c-5g compounds with E. coli (2Y2T) receptor …………………………………..**S7**

**
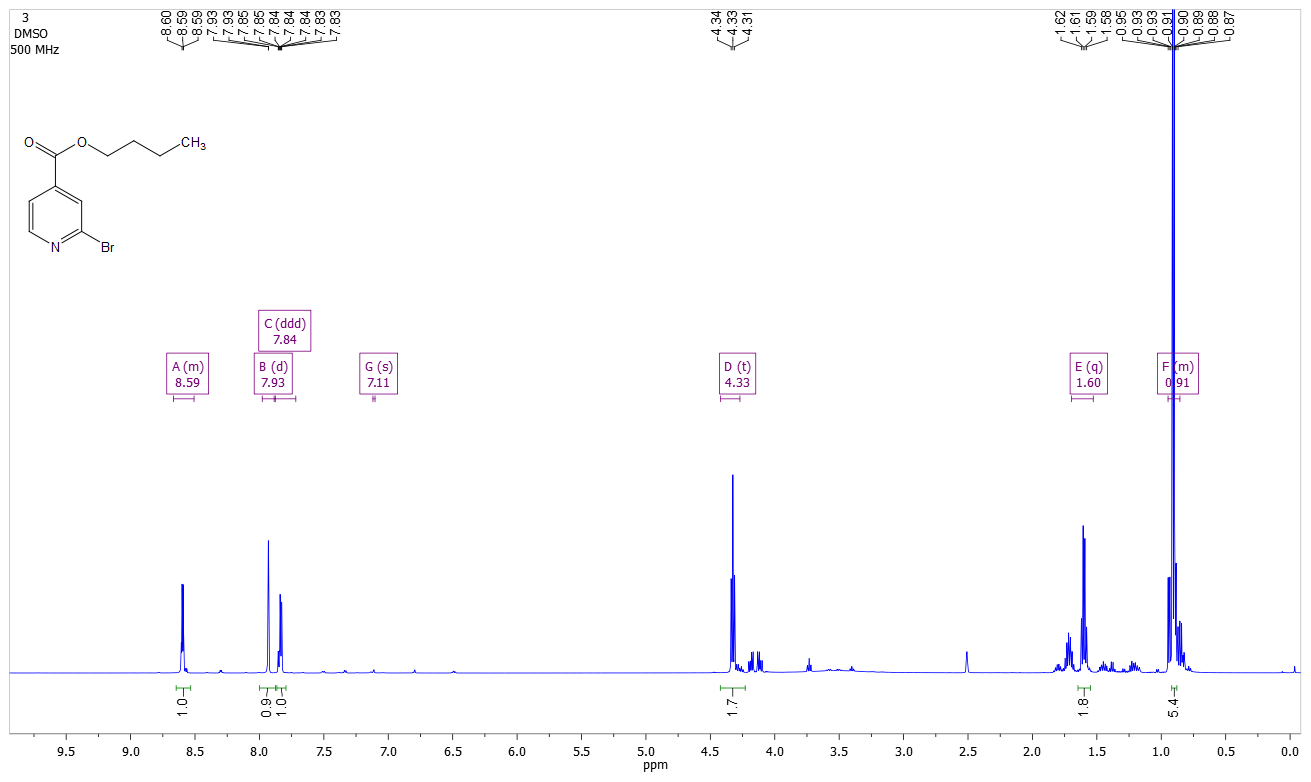
**

**Figure S1: 1**H-NMR (500 MHz, DMSO-d6) spectrum of compound **3.**

**
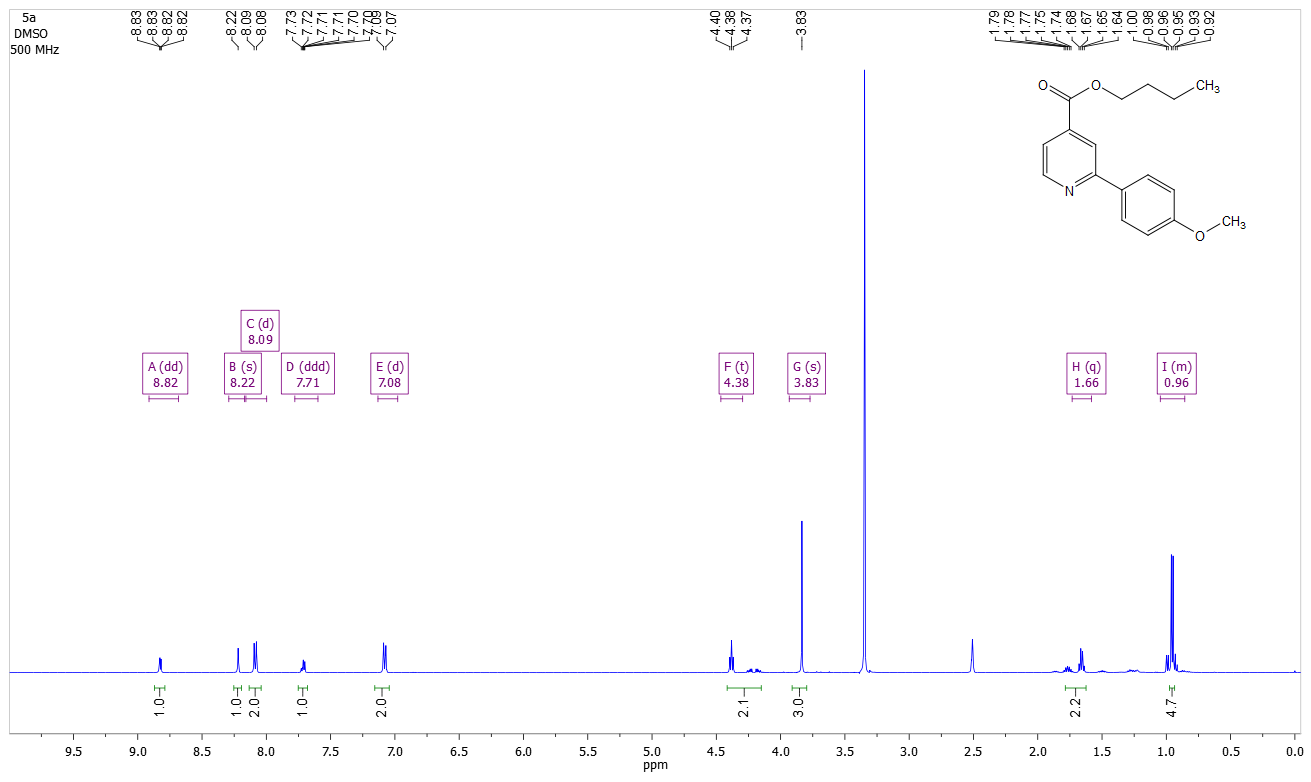
**

**Figure S2: 1**H-NMR (500 MHz, DMSO-d6) spectrum of compound **5a.**

**
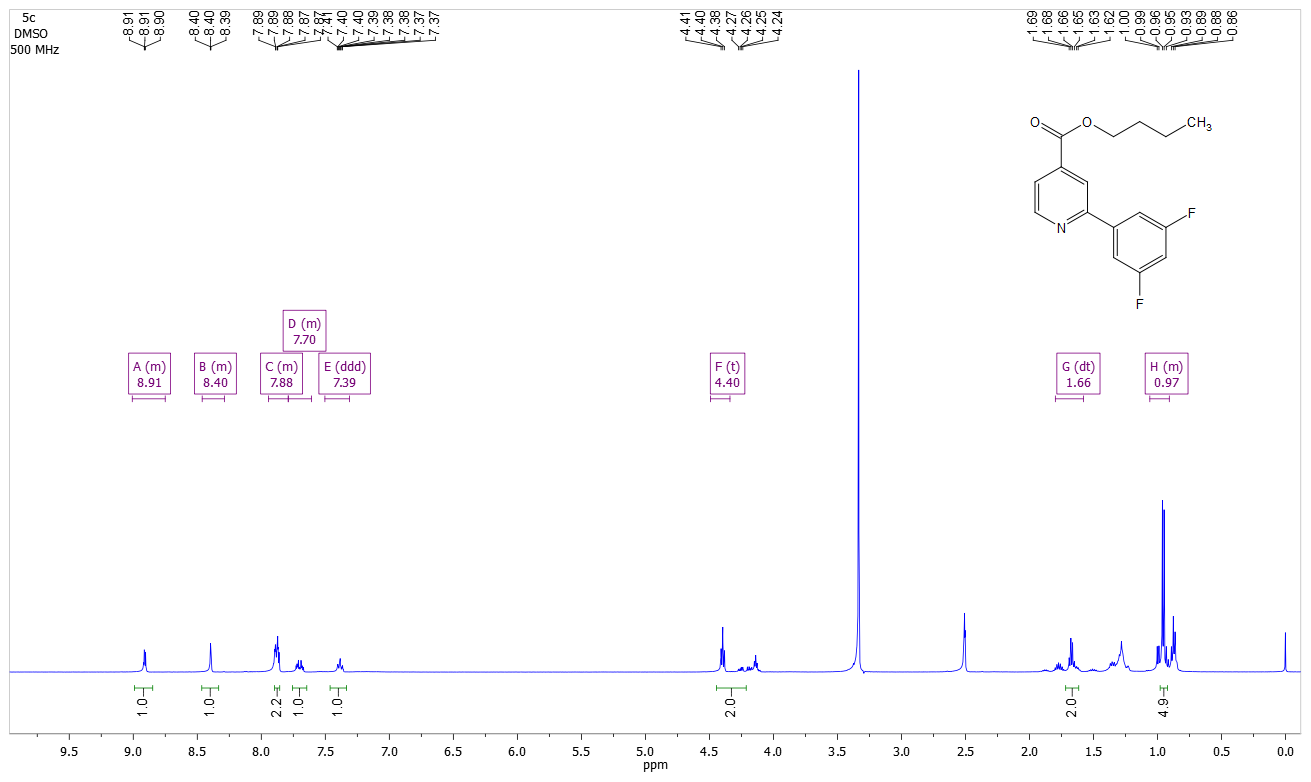
**

**Figure S3: 1**H-NMR (500 MHz, DMSO-d6) spectrum of compound **5c.**

**
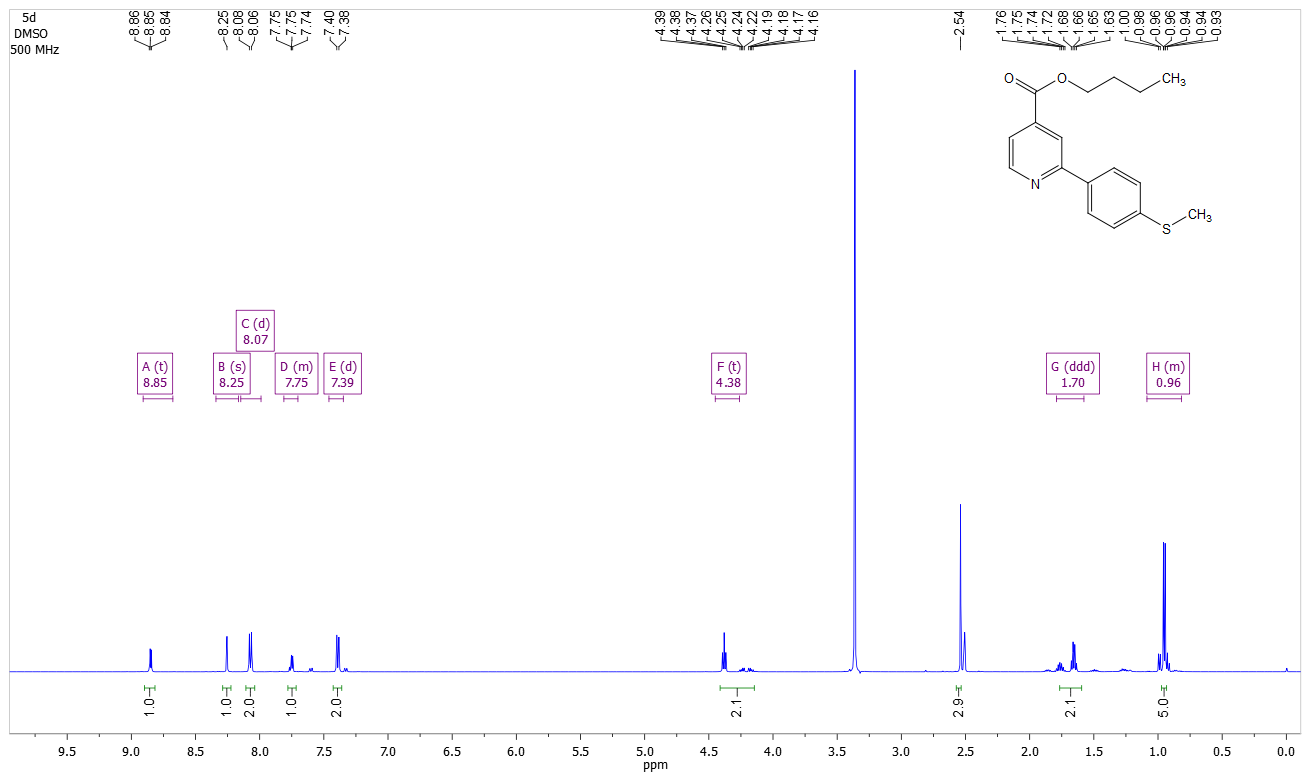
**

**Figure S4: 1**H-NMR (500 MHz, DMSO-d6) spectrum of compound **5d.**

**
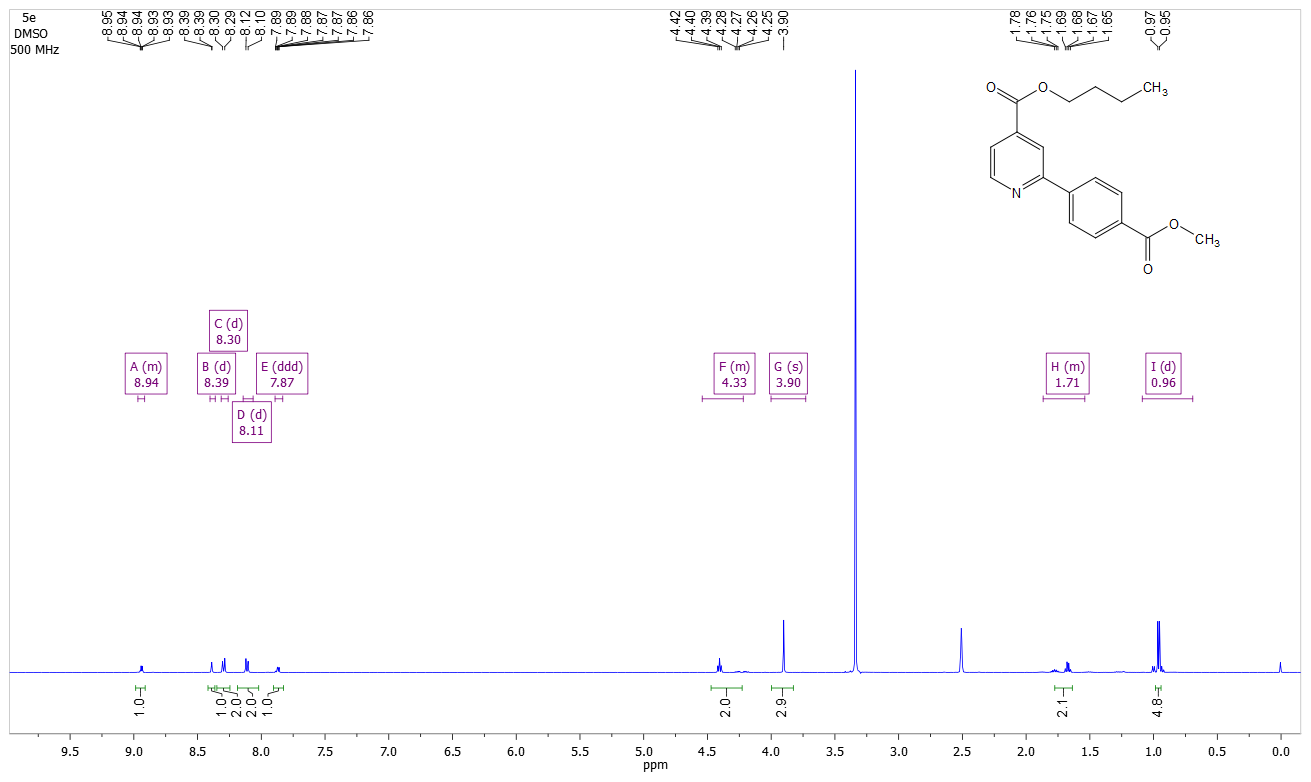
**

**Figure S5: 1**H-NMR (500 MHz, DMSO-d6) spectrum of compound **5e.**

**
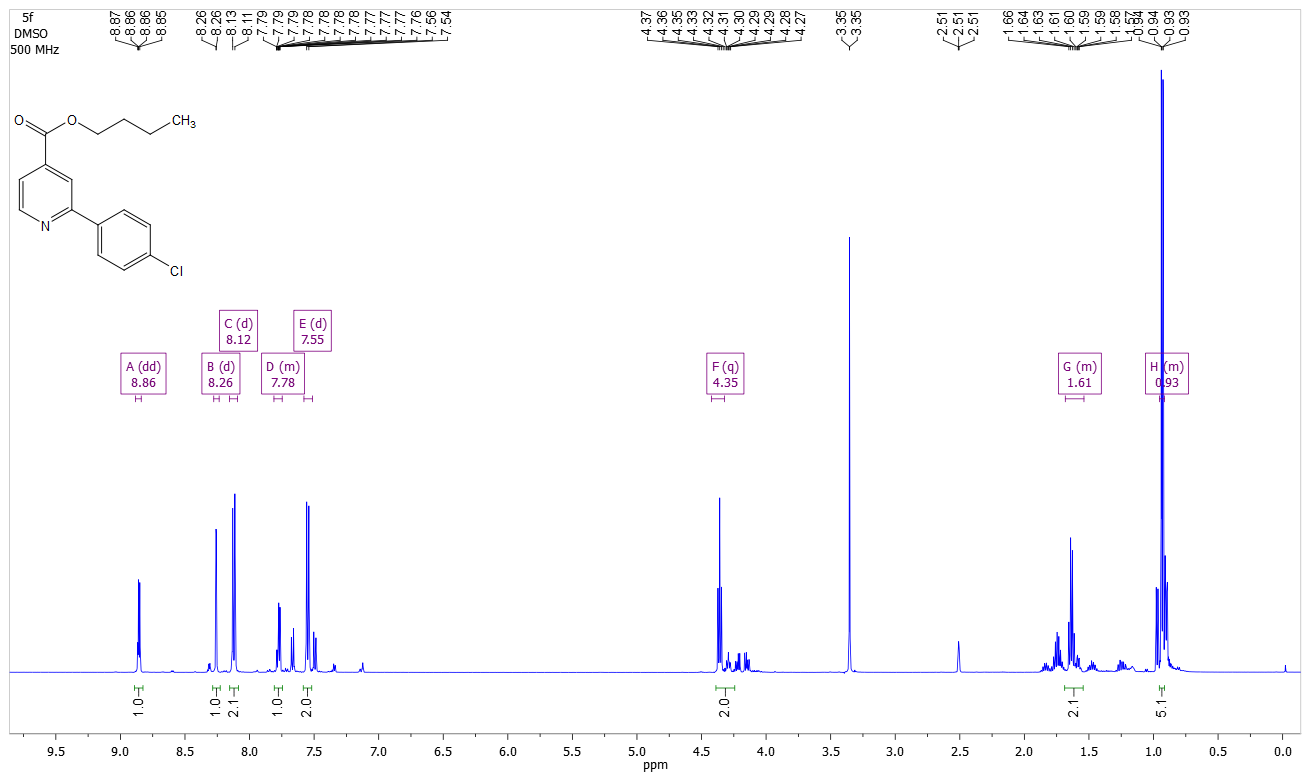
**

**Figure S6: 1**H-NMR (500 MHz, DMSO-d6) spectrum of compound **5f.**

**
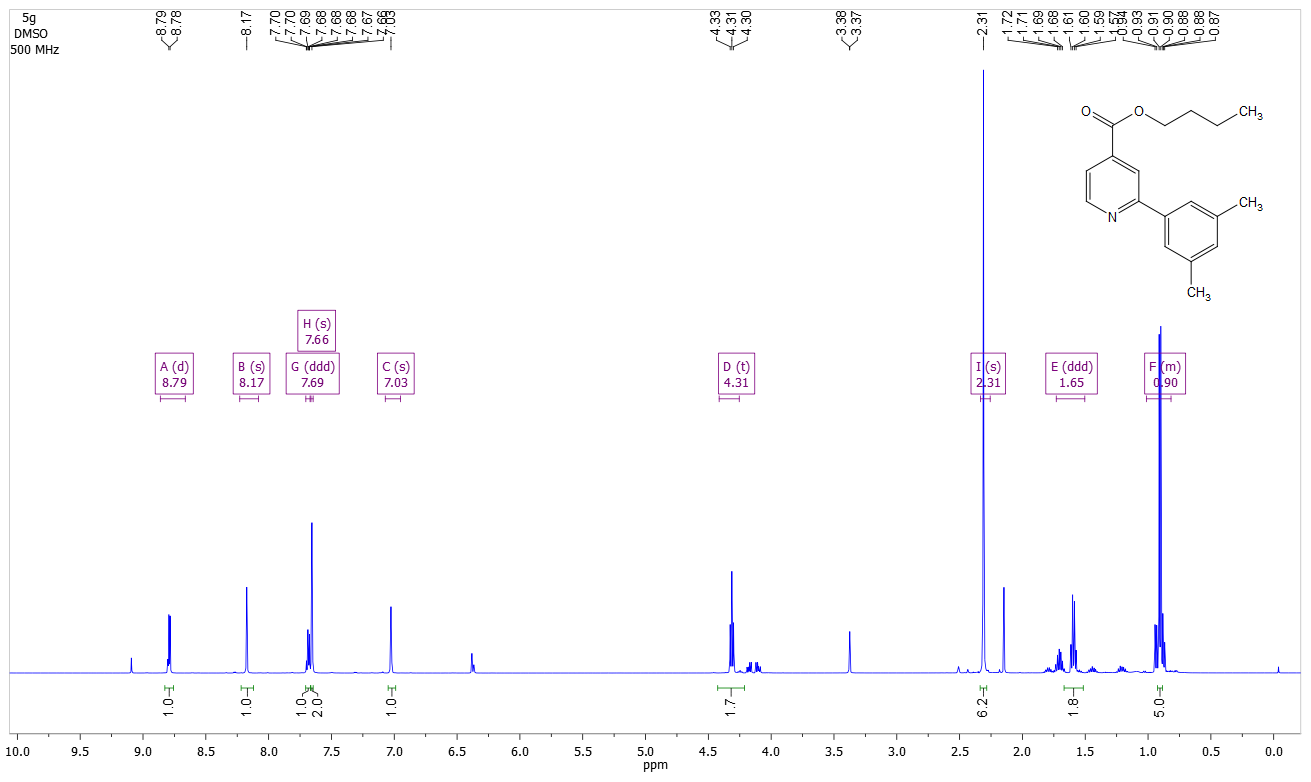
**

**Figure S7: 1**H-NMR (500 MHz, DMSO-d6) spectrum of compound **5g.**

**
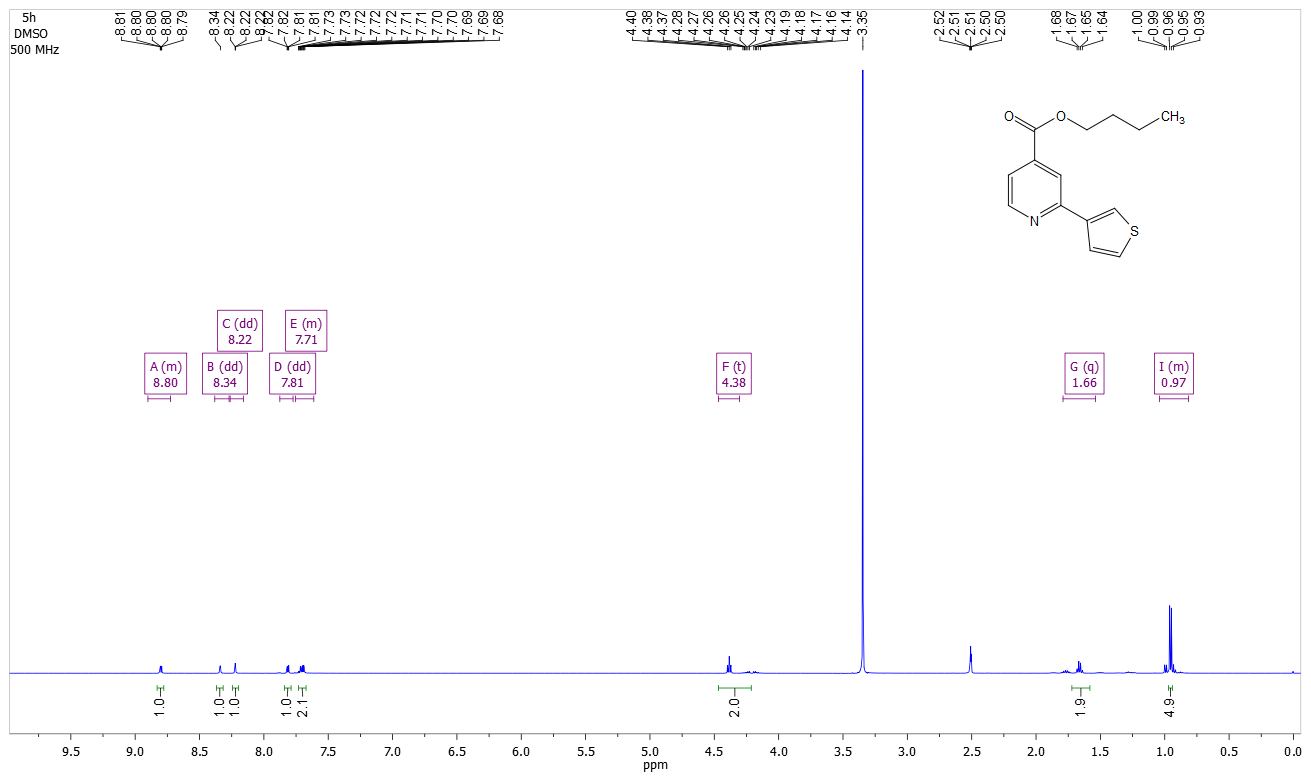
**

**Figure S8: 1**H-NMR (500 MHz, DMSO-d6) spectrum of compound **5h.**


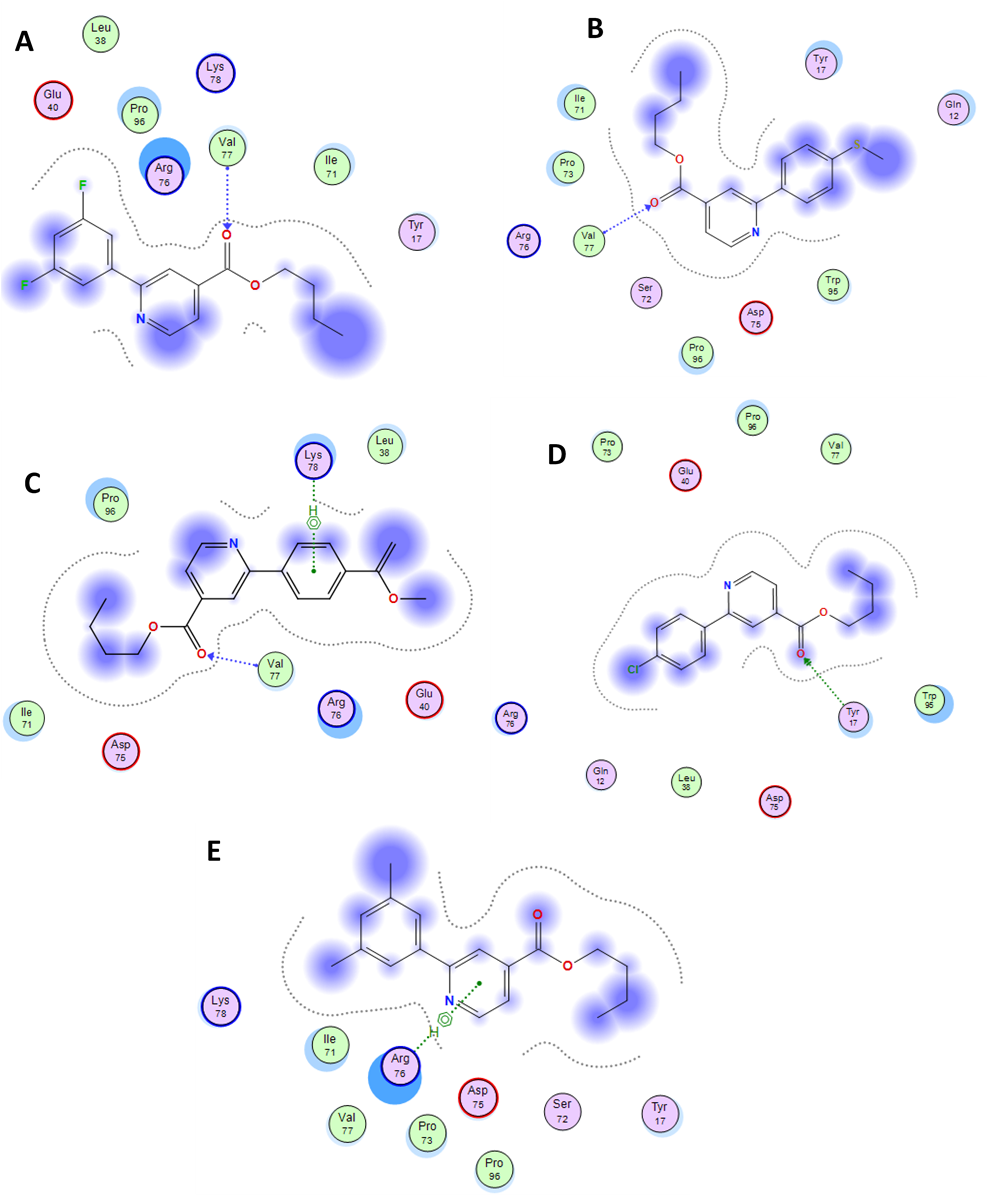


**Figure S9**: Interaction pattern of 5c-5g compounds with E. coli (2Y2T) receptor. A) **5c** forming 1H bond with Val77. B) **5d** forming 1H bond with Val77. C) **5e** forming 1H bond and 1-pi-H bond with Lys78. D) **5f** forming 1H bond with Tyr17. E) **5g** forming 1-hydrophboic interaction with Arg76.
